# Supplementary material for: The relative contributions of infectious and mitotic spread to HTLV-1 persistence
Source: PubMed Central journal article supplement (PMC7524007; doi:10.1371/journal.pcbi.1007470), 2020-09-17
Supplement: pcbi.1007470.s001.pdf [file pcbi.1007470.s001.pdf]

1 Estimation of  $\pi$ ,  $\delta$  and  $K$

2 We describe the dynamics of all CD4<sup>+</sup>CD45RO<sup>+</sup> cells  $y$  by

3 
$$\dot{y} = \frac{p}{k + y} y - \mu y$$

4 the dynamics of uninfected CD4<sup>+</sup>CD45RO<sup>+</sup> cells  $n$  by

5 
$$\dot{n} = \frac{p'}{k + y} n - \mu' n$$

6 and the dynamics of infected cells  $x$  by

7 
$$\dot{x} = \frac{\pi}{k + y} x - \delta x$$

8 where  $y$  is the total number of CD4<sup>+</sup>CD45RO<sup>+</sup> T cells,  $x$  is the number of infected  
9 CD4<sup>+</sup>CD45RO<sup>+</sup> T cells,  $n$  is the number of uninfected CD4<sup>+</sup>CD45RO<sup>+</sup> T cells ( $y = x +$   
10  $n$ ),  $p/k$  is the maximal proliferation rate of CD4<sup>+</sup>CD45RO<sup>+</sup> cells (half maximal when  $y$   
11  $= k$ ),  $p'/k$  is the maximal proliferation of uninfected CD4<sup>+</sup>CD45RO<sup>+</sup> cells,  $\pi/k$  is the  
12 maximal proliferation rate of infected CD4<sup>+</sup>CD45RO<sup>+</sup> cells and  $\mu$ ,  $\mu'$  and  $\delta$  the death  
13 rates of  $y$ ,  $n$  and  $x$  respectively.

14

15 To estimate  $\pi$  and  $k$  we need estimates of the per capita proliferation rate  $\pi / (k + y)$   
16 at two values of  $y$ . We chose in a lymphocyte replete ( $y = y_R$ ) and in a lymphocyte  
17 depleted host ( $y = 0$ )

18  $y = y_R$

19 We first estimate the per capita proliferation rate of infected CD4<sup>+</sup>CD45RO<sup>+</sup> T cells

20 
$$\pi^* = \frac{\pi}{k + y_R}$$

21 in a lymphocyte replete host.

22

23 The data provided in Supplementary Table 2A Asquith et al [16] gives the estimated  
 24 proliferation rate of CD4<sup>+</sup>CD45RO<sup>+</sup> T cells as a function of proviral load (measured as  
 25 % of PBMC infected). If we convert proviral load to fraction of CD4<sup>+</sup>CD45RO<sup>+</sup> T cells  
 26 infected assuming that all proviral load is in CD4<sup>+</sup>CD45RO<sup>+</sup> T cells and that  
 27 CD4<sup>+</sup>CD45RO<sup>+</sup> T cells make up approximately 15% of PBMC then we can plot the  
 28 following relationship:

29

30

31

32

33

34

35

36

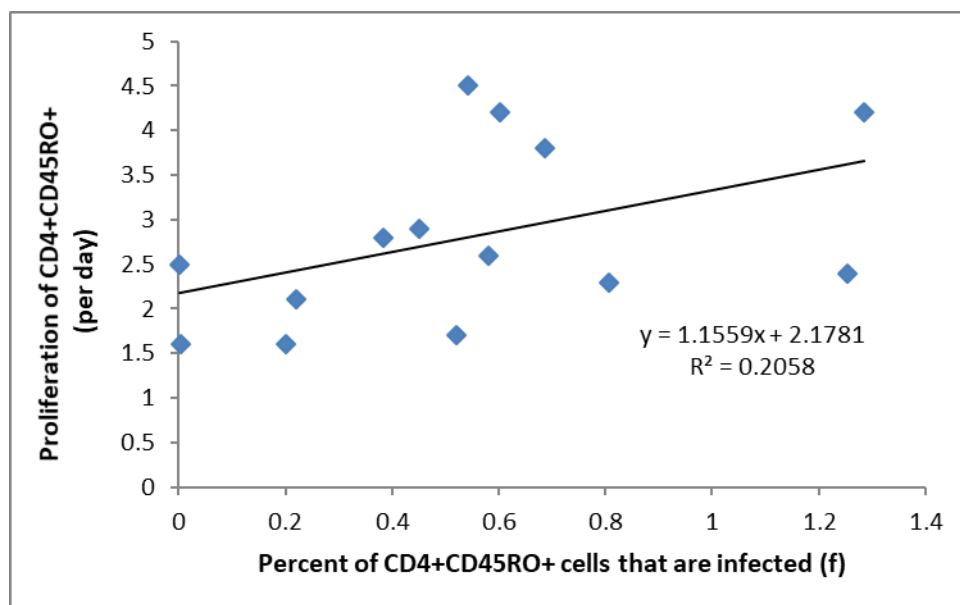

37 The measured proliferation rate in infected individuals is a combination of the  
 38 proliferation rate of uninfected CD4<sup>+</sup>CD45RO<sup>+</sup> cells  $p^* / (k + y)$  at rate previously  
 39 estimated to be approximately 2% per day [16-18] (consistent with the estimate of

40 2.18% per day above when  $f = 0$ ) and the proliferation rate  $\pi^* = \pi / (k + y)$  of infected  
41 cells

42 proliferation of CD4+CD45RO+ cells =  $2(1 - f) + \pi^* f$

43 Comparing with the equation of a straight line above we can see that  $\pi^* = 1.1559 + 2$   
44 =  $3.16 \text{ d}^{-1}$

45 So in lymphocyte replete HTLV-1 infected host the average proliferation rate of  
46 infected cells is 3.16% per day. We can therefore conclude that at equilibrium  $\delta =$   
47 3.16% per day.

48  $y = 0$

49 In a lymphocyte depleted host ( $y = 0$ ) the proliferation rate will be maximal. We assume  
50 that this is 100% per day.

51

52 We estimate that the number of CD4+CD45RO+ T cells in a lymphocyte replete adult  
53 is approximately  $5.25 \times 10^{11}$  ( $2 \times 10^{12}$  lymphocytes, of which 75% are CD3+, of which  
54 70% are CD4+, of which 50% are RO+). We thus have two equations:

55 
$$3.16 = \frac{\pi}{k + 5.25 \times 10^{11}}$$
$$100 = \frac{\pi}{k}$$

56 then by solving these two equations simultaneously we find

57  $\pi = 1.7 \times 10^{12}$  cells per day

58  $k = 1.7 \times 10^{10}$  cells

59 If we assume that at equilibrium the number of uninfected cells ( $n$ ) is constant, and let  
60  $K = k + n$ , then we can write  $k + y = k + n + x = K + x$ .  $K$  is the density dependency  
61 parameter used in the hybrid model (Eq (1) in main text).

62

63 In a typical HTLV-1 infected individual proviral load is of the order of 1% PBMC. Using  
64 the figures above ( $CD4^+CD45RO^+$  T cells make up approximately 15% of PBMC,  
65 number of  $CD4^+CD45RO^+$  T cells in a lymphocyte replete adult is approximately  $5.25$   
66  $\times 10^{11}$ ) we can estimate the number of uninfected  $CD4^+CD45RO^+$  T cells in the body  
67 ( $n$ ) as:

68 
$$\% \text{ of PBMC infected} = 1\%$$

69 
$$\% \text{ of } CD4^+CD45RO^+ \text{ infected} = 1\% / 0.15 = 6.7\%$$

70 
$$\text{Number of } CD4^+CD45RO^+ \text{ uninfected } (n) = 0.933 \times 5.25 \times 10^{11} = 4.9 \times 10^{11}$$

71 And so

72 
$$K = k + n = 1.7 \times 10^{10} + 4.9 \times 10^{11} = 5 \times 10^{11} \text{ cells}$$

73 So to summarise we estimate:

74 
$$\delta = 3.16\% \text{ per day}$$

75 
$$\pi = 1.7 \times 10^{12} \text{ cells per day}$$

76 
$$K = 5.1 \times 10^{11} \text{ cells}$$

77 These parameters are used in the hybrid model. We note that in the upper bound  
78 model we only use  $\delta$  (i.e. our estimates are independent of values chose for  $\pi$  and  $K$ )  
79 and for the occupancy class model we do not use any of these parameters (i.e. our  
80 estimates are independent of  $\delta$ ,  $\pi$  and  $K$ ).
