# Supplementary material for: The relative contributions of infectious and mitotic spread to HTLV-1 persistence
Source: PubMed Central journal article supplement (PMC7524007; doi:10.1371/journal.pcbi.1007470), 2020-09-17
Supplement: pcbi.1007470.s002.pdf [file pcbi.1007470.s002.pdf]

## 1 Stochastic Model of Within-Host HTLV-1 Dynamics

2 The following is based on [1, 2]. Consider a system with a discrete number of  
3 individuals, where each individual belongs to exactly one species or type. Assume that  
4 there are  $S \in \mathbb{N}$  species  $(\mathcal{S}_1, \mathcal{S}_2, \dots, \mathcal{S}_S)$ , and that species  $\mathcal{S}_i$  has a frequency  
5  $X_i(t) \in \mathbb{N}_0 = \mathbb{N} \cup \{0\}$  at time  $t$ . Assume further that all individuals of the same species  
6 are identical. Then the vector  $X(t) = (X_1(t), X_2(t), \dots, X_S(t))^T \in \mathbb{N}_0^S$  is a random variable  
7 that describes the population of the system at time  $t$ . In our case, the individuals are  
8 HTLV-1 infected cells, and species are HTLV-1 infected clones (populations of cells  
9 identically infected with HTLV-1 with a common site of proviral integration in the host  
10 genome).

11

12 Suppose there are  $\rho_1, \dots, \rho_C$  possible reactions in the system, where a reaction  $\rho_c$   
13 ( $c \in \{1, \dots, C\}$ ) is a mapping given by

$$14 \quad \rho_c : \mathbb{N}_0^S \xrightarrow{g_c} \mathbb{N}_0^S \quad (\text{S1})$$

$$15 \quad \rho_c : \sum_{i=1}^S \kappa_{ci}^{\text{IN}} \mathcal{S}_i \xrightarrow{g_c} \sum_{i=1}^S \kappa_{ci}^{\text{OUT}} \mathcal{S}_i \quad (\text{S2})$$

$$16 \quad \rho_c : \kappa_{c1}^{\text{IN}} \mathcal{S}_1 + \dots + \kappa_{cS}^{\text{IN}} \mathcal{S}_S \xrightarrow{g_c} \kappa_{c1}^{\text{OUT}} \mathcal{S}_1 + \dots + \kappa_{cS}^{\text{OUT}} \mathcal{S}_S \quad (\text{S3})$$

17 where  $\kappa_{ci}^{\text{IN}}, \kappa_{ci}^{\text{OUT}} \in \mathbb{N}_0$  are the number of individuals of the  $i^{\text{th}}$  species respectively  
18 required for and present after the  $c^{\text{th}}$  reaction, and  $g_c > 0$  is the reaction constant, which  
19 represents the average probability that a particular combination of  $\sum_{i=1}^S \kappa_{ci}^{\text{IN}} \mathcal{S}_i$  individuals

20 will react according to reaction  $\rho_c$  in an infinitesimal time interval [3]. We define the  
 21 stoichiometric vector  $v_c$  as the difference to the state vector  $X(t)$  made by reaction  $c$

$$22 \quad v_c = (\kappa_{c1}^{\text{OUT}} - \kappa_{c1}^{\text{IN}}, \dots, \kappa_{cS}^{\text{OUT}} - \kappa_{cS}^{\text{IN}})^T \in \mathbb{Z}^S \quad (\text{S4})$$

23 We consider three types of reaction (namely cell death, mitosis, or infectious spread  
 24 from each clone). It is important to note that, within a particular clone, there is no  
 25 source inflow from frequency 0 to frequency 1 in our birth-death process. That is, we  
 26 do not have a reaction  $\rho_j$  such that

$$27 \quad \rho_j : * \xrightarrow{\lambda} \mathcal{X} \quad (\text{S5})$$

28 for some constant value  $\lambda$ , as a clone cannot proliferate once it has become extinct.

29

30 The propensity function  $\alpha_c$  of reaction  $\rho_c$  is the reaction constant  $g_c$  multiplied by the  
 31 number of different combinations of individuals required for reaction  $\rho_c$ , and is given  
 32 by

$$33 \quad \alpha_c(x) = g_c \prod_{i=1}^S \frac{x_i!}{(x_i - \kappa_{ci}^{\text{IN}})! (\kappa_{ci}^{\text{IN}})!} \quad (\text{S6})$$

34 for a potential state of the system  $x = (x_1, x_2, \dots, x_S)^T \in \mathbb{N}_0^S$  (i.e.  $x_i$  is the number of  
 35 particles of species  $S_i$ ). The evolution of the state vector  $X(t)$  is given by

$$36 \quad X(t) = y_0 + \sum_{c=1}^C P_c \left( \int_0^t \alpha_c(X(s)) ds \right) v_c \quad (\text{S7})$$

37 for initial  $y_0 \in \mathbb{N}_0^S$ . Eq (S7) states that the population  $X(t)$  at time  $t$  is equal to the initial  
 38 population  $y_0$  plus the sum over all reactions of the change  $v_c$  to the population

39 induced by each reaction, multiplied by the (random) number of times the reaction has  
 40 occurred. The number of times each reaction occurs is given by a Poisson distribution  
 41 in the time interval  $[0, t]$  with expected value of  $\int_0^t \alpha_c(X(s))ds$ , i.e. a Poisson distribution  
 42  $\mathcal{P}_c\left(\int_0^t \alpha_c(X(s))ds\right)$ .

43

44 Master Equation: Mass-Action Rate Birth-Death Process

45 The probability distribution associated to the random variable  $X(t) \in \mathbb{N}_0^{S_{\max}}$  in (S7) is  
 46 given by  $\mathbb{P}(X;t) = \mathbb{P}(X(t) = y | X(0) = y_0)$ , where  $y, y_0 \in \mathbb{N}_0^{S_{\max}}$ .  $\mathbb{P}(X;t)$  is a column vector  
 47 where each entry is a probability associated to a potential state of the random variable.  
 48 It can be shown [2, 4-6] that  $\mathbb{P}(X;t)$  is the solution to the Chemical Master Equation

$$49 \quad \frac{\partial \mathbb{P}(X = y;t)}{\partial t} = \sum_{c=1}^C (\alpha_c(y - v_c) \mathbb{P}(X = y - v_c;t) - \alpha_c(y) \mathbb{P}(X = y;t)) \quad (\text{S8})$$

50 We can interpret Eq (S8) as follows: the rate of change in the probability of the state  
 51 taking value  $X(t) = y$  is the sum over all reactions of the probability of arriving at state  
 52  $X(t) = y$  via reaction  $\rho_c$  (having previously been in state  $X(t) = y - v_c$ ) minus the  
 53 probability of leaving state  $X(t) = y$  via reaction  $\rho_c$ .

54

55 Transition Matrix

56 If there is no upper limit on the frequency a given clone may take, the state space is  
 57 given by  $\Omega = \mathbb{N}_0$  (Fig 3A). If however a clone is bounded by a maximum frequency  
 58  $\tau \in \mathbb{N}$ , then the state space is given by  $\Omega_\tau = \{0, \dots, \tau\}$  (Fig 3B). We refer to  $\Omega_\tau$  as a

59 “truncated state space”. Using  $\Omega_\tau$ , we can summarise Eq (S8) using multiple, simpler  
 60 differential equations

$$61 \quad \frac{d\mathbb{P}(X_i;t)}{dt} = A\mathbb{P}(X_i;t) \quad \text{for } i = 1, \dots, S_{max} \quad (\text{S9})$$

62 where  $A$  is a  $\tau \times \tau$  transition matrix associated with the state space  $\Omega_\tau$  [7, 8].  $A$  is a  
 63 tridiagonal sparse matrix with all entries equal to zero except:

$$64 \quad A_{f,f} = -f(\pi^* + \delta), \quad 0 \leq f \leq \tau$$

$$65 \quad A_{f,f+1} = (f+1)\delta, \quad 0 \leq f \leq \tau-1 \quad (\text{S10})$$

$$66 \quad A_{f+1,f} = f\pi^* \quad 1 \leq f \leq \tau-1$$

67 where we index from  $f = 0$  as the first term in the state space, and where  $\pi^*$  is the  
 68 aggregate cell proliferation rate, which remains constant when HTLV-1 proviral load is  
 69 at equilibrium. In our system,  $A$  does not have any time-dependent factors, and so Eq  
 70 (S9) has solution

$$71 \quad \mathbb{P}(X_i;t) = e^{At}\mathbb{P}_{0,i} \quad (\text{S11})$$

72 where  $\mathbb{P}_{0,i} = \mathbb{P}(X_i;t=0)$  is the initial probability distribution and  $e^{At}$  is the matrix  
 73 exponential [9].

74

75 Initial Probability Distribution

76 The initial probability distribution  $\mathbb{P}_{0,i} = \mathbb{P}(X_i;t=0) \in \mathbb{R}^\tau$  [9] can be used to enter a fixed

77 initial value, in which case for initial value  $X_i(0) = y_{0,i} \in \{0, \dots, \tau\}$ ,  $y_i \in \{0, \dots, \tau\}$ ,  $\tau \in \mathbb{N}$  we

78 have

$$79 \quad \mathbb{P}_{0,i} = \delta_{y_i, y_{0,i}} \quad (S12)$$

80 where  $\delta_{y_i, y_{0,i}}$  [10] is the Kronecker delta such that

$$81 \quad \delta_{y_i, y_{0,i}} = \begin{cases} 1, & \text{if } y_i = y_{0,i} \\ 0, & \text{if } y_i \neq y_{0,i} \end{cases} .$$

82

83 Matrix exponential

84 Computing the matrix exponential  $e^{At}$  is straightforward in principle, but considerably

85 more difficult in practice when the dimension of the matrix is large [11-14].

86 Compounding this problem, multiple probability distributions at multiple time points are

87 often desired. Fortunately however, the probability distribution for a series of time

88 points can be calculated recursively using a single matrix exponential. More precisely,

89 if the reaction propensities are independent of time, we can compute the matrix

90 exponential  $e^{As}$  for a given time step  $s$ , and then recursively calculate the probability

91 distribution at any time that is a multiple of  $s$ . Therefore, for  $k \in \mathbb{N}_0$ , we have the

92 following recurrence relation:

$$93 \quad \mathbb{P}(X_i; t = s) = e^{As} \mathbb{P}_{0,i}$$

$$94 \quad \mathbb{P}(X_i; t = ks) = e^{As} \mathbb{P}(X_i; t = (k-1)s)$$

95 In long form, we have

$$96 \quad \mathbb{P}(X_i; t = ks) = e^{Aks} \mathbb{P}_{0,i} = (e^{As})^k \mathbb{P}_{0,i}$$

97 This means the computationally expensive [11] matrix exponential  $e^{As}$  needs to be

98 calculated once only, and then recursively multiplied  $k$  times, which incurs significantly

99 less runtime than calculating the matrix exponential  $k$  times.

100

101 It is important to note that there is no source inflow from frequency 0 to frequency 1 in  
102 our birth-death process. That is, we do not have a reaction  $\rho_j$  such that

103 
$$\rho_j : * \xrightarrow{\lambda} \mathcal{X}$$

104 for some constant value  $\lambda$ , as a clone cannot proliferate once it has become extinct.

105

### 106 Stochastic threshold frequency $F$ and state space upper limit $\tau$

107 To allow the possibility that a given clone goes extinct, a stochastic model is  
108 necessary; a purely deterministic set of ODEs would not allow HTLV-1 clones to die  
109 out. Ideally, each clone would be modelled stochastically, however in practice this is  
110 not computationally tractable, and so some clones must be modelled deterministically.  
111 The dynamics of large clones can be better approximated than those of small clones  
112 by a deterministic process. Further the errors associated with considering a stochastic  
113 process deterministically will decrease with the size of the clone. It is also true that  
114 larger clones are less likely to die out, and therefore modelling their extinction  
115 probability is less important. We took an empirical approach to specifying a threshold  
116 frequency  $F$  above which clones are modelled deterministically and below which  
117 clones are modelled stochastically.

118

119 We defined the threshold frequency  $F$  in terms of the extinction probability over an  
120 arbitrarily long duration. We chose a duration  $t_{\text{Dur}} = 3133$  days, as this was the  
121 maximum time between a patient's first and last blood samples. Clones with a low  
122 probability of extinction over this period can be modelled deterministically without

123 adversely affecting the modelling of infectious spread. Whereas clones with more than  
124 a 1% chance of extinction over this period are modelled stochastically. Therefore  $F$  is  
125 given by

$$126 \quad F = \min\{f : \mathbb{P}(X_i(t_{\text{Dur}}) = 0 \mid X_i(0) = f) < 0.01 \} \quad (\text{S13})$$

127 given the rates of cell death and mitotic spread, and density dependency (S3A Fig).  
128 The upper limit  $\tau$  of clone frequency is chosen to be sufficiently large not to constrain  
129 the trajectory of a growing clone. If this upper limit is too small, then the growth of a  
130 clone may be artificially limited, because it may “bounce” off the upper limit, as this  
131 cannot be exceeded by a stochastically modelled clone (Fig 3B). S3B Fig shows that  
132 a clone given a starting frequency  $F = 460$  has a negligible probability of reaching  
133 frequency  $\tau = 1500$  after 3133 days, and therefore we chose  $\tau = 1500$  as the upper  
134 limit on the clone state space.

135

### 136 Hybrid model propagation: Strang splitting

137 For clones above threshold frequency  $F$ , we assume the expected values from the  
138 deterministic ODEs provide an adequate description of their behaviour. We thus  
139 partition our system of the within-host dynamics of HTLV-1 infection into two  
140 constituent systems: a deterministic system  $D(t)$  modelled by a system of ODEs and  
141 a stochastic system  $\sigma(t)$  modelled by multiple master equations. We propagate these  
142 systems concurrently as a hybrid model, using the following procedure of “Strang  
143 splitting” [15] for a given time step  $t_n$  of duration  $h$  (formulation below taken from [1]):

- 144 1. Half time step in deterministic  $D(t)$ : Solve deterministic process in time interval  
145  $[t_n, t_n + h/2]$ ; keep  $\sigma(t)$  constant.

- 146 2. Full time step in stochastic  $\sigma(t)$ : Solve stochastic process (i.e. clone-specific  
147 master equations) in time interval  $[t_n, t_{n+1}]$  and keep  $D(t_n + h/2)$  constant.
- 148 3. Next half time step in deterministic system  $D(t)$  : Solve deterministic process in  
149 time interval  $[t_n + h/2, t_{n+1}]$  and keep  $\sigma(t)$  constant.
- 150 The error associated in not propagating both systems exactly simultaneously is a  
151 function of the length of the time step  $h$  [1]. Modelling the whole system for a single  
152 time step consists of steps 1 to 3 (Fig 2B).

153

154

155

## REFERENCES

- 156 1. Jahnke T, Kreim M. Error bound for piecewise deterministic processes  
157 modeling stochastic reaction systems. *Multiscale Modeling & Simulation*.  
158 2012;10(4):1119-47.
- 159 2. Jahnke T, Sunkara V. Error Bound for Hybrid Models of Two-Scaled Stochastic  
160 Reaction Systems. In: Dahlke S, Dahmen W, Griebel M, Hackbusch W, Ritter K,  
161 Schneider R, et al., editors. *Extraction of Quantifiable Information from Complex  
162 Systems*. Cham: Springer International Publishing; 2014. p. 303-19.
- 163 3. Gillespie DT. Exact stochastic simulation of coupled chemical reactions. *The  
164 Journal of Physical Chemistry*. 1977;81(25):2340-61. doi: 10.1021/j100540a008.
- 165 4. Van Kampen NG. *Stochastic processes in physics and chemistry*: Elsevier;  
166 1992.



- 167 5. Gillespie DT. A rigorous derivation of the chemical master equation. *Physica A: Statistical Mechanics and its Applications*. 1992;188(1):404-25.
- 168
- 169 6. Jahnke T. On reduced models for the chemical master equation. *Multiscale Modeling & Simulation*. 2011;9(4):1646-76.
- 170
- 171 7. Jahnke T, Huisinga W. A dynamical low-rank approach to the chemical master equation. *Bulletin of mathematical biology*. 2008;70(8):2283-302.
- 172
- 173 8. Hegland M, Burden C, Santoso L, MacNamara S, Booth H. A solver for the stochastic master equation applied to gene regulatory networks. *Journal of computational and applied mathematics*. 2007;205(2):708-24.
- 174
- 175
- 176 9. Stewart WJ. *Introduction to the numerical solutions of Markov chains*: Princeton Univ. Press; 1994.
- 177
- 178 10. Peleš S, Munsky B, Khammash M. Reduction and solution of the chemical master equation using time scale separation and finite state projection. *The Journal of chemical physics*. 2006;125(20):204104.
- 179
- 180
- 181 11. Moler C, Van Loan C. Nineteen dubious ways to compute the exponential of a matrix. *SIAM review*. 1978;20(4):801-36.
- 182
- 183 12. Moler C, Van Loan C. Nineteen dubious ways to compute the exponential of a matrix, twenty-five years later. *SIAM review*. 2003;45(1):3-49.
- 184

185 13. Higham NJ. The scaling and squaring method for the matrix exponential  
186 revisited. SIAM review. 2009;51(4):747-64.

187 14. Lopez L, Simoncini V. Analysis of projection methods for rational function  
188 approximation to the matrix exponential. SIAM Journal on Numerical Analysis.  
189 2006;44(2):613-35.

190 15. Strang G. On the construction and comparison of difference schemes. SIAM  
191 Journal on Numerical Analysis. 1968;5(3):506-17.
