# Supplementary material for: The relative contributions of infectious and mitotic spread to HTLV-1 persistence
Source: PubMed Central journal article supplement (PMC7524007; doi:10.1371/journal.pcbi.1007470), 2020-09-17
Supplement: pcbi.1007470.s004.pdf [file pcbi.1007470.s004.pdf]

**S1 Table.** Patient sample characteristics and diversity estimates.

| Patient (Disease Status <sup>‡</sup> ) | Blood sample [Date (replicate number)] | Proviral load (no. HTLV-1+ cells per 10,000 PBMCs) [1] | Number of clones [Observed [1]/ Estimated [2]] | Estimated percentage of clones that are singletons (clones with one infected cell only) [2] |
|----------------------------------------|----------------------------------------|--------------------------------------------------------|------------------------------------------------|---------------------------------------------------------------------------------------------|
| 1 (AC)                                 | 07/12/2000 (1)                         | 400                                                    | 993 / 55898                                    | 9.6                                                                                         |
| 1 (AC)                                 | 07/12/2000 (2)                         | 400                                                    | 1047 / 62527                                   | 9.7                                                                                         |
| 1 (AC)                                 | 07/12/2000 (3)                         | 400                                                    | 935 / 53598                                    | 9.5                                                                                         |
| 1 (AC)                                 | 13/12/2004 (1)                         | 490                                                    | 1187 / 54610                                   | 9.2                                                                                         |
| 1 (AC)                                 | 13/12/2004 (2)                         | 490                                                    | 1423 / 56531                                   | 9.1                                                                                         |
| 1 (AC)                                 | 13/12/2004 (3)                         | 490                                                    | 1047 / 37353                                   | 8.3                                                                                         |
| 1 (AC)                                 | 17/11/2008 (1)                         | 360                                                    | 1273 / 37295                                   | 8.3                                                                                         |
| 1 (AC)                                 | 17/11/2008 (2)                         | 360                                                    | 896 / 56753                                    | 9.8                                                                                         |
| 1 (AC)                                 | 17/11/2008 (3)                         | 360                                                    | 1122 / 41432                                   | 8.8                                                                                         |
| 2 (UV)                                 | 03/04/2000 (1)                         | 130                                                    | 698 / 19773                                    | 7.9                                                                                         |
| 2 (UV)                                 | 03/04/2000 (2)                         | 130                                                    | 622 / 16882                                    | 7.7                                                                                         |
| 2 (UV)                                 | 03/04/2000 (3)                         | 130                                                    | 559 / 21705                                    | 8.5                                                                                         |
| 2 (UV)                                 | 16/06/2005 (1)                         | 120                                                    | 550 / 23319                                    | 8.6                                                                                         |
| 2 (UV)                                 | 16/06/2005 (2)                         | 120                                                    | 778 / 18211                                    | 7.7                                                                                         |
| 2 (UV)                                 | 16/06/2005 (3)                         | 120                                                    | 638 / 23869                                    | 8.6                                                                                         |
| 2 (UV)                                 | 22/09/2008 (1)                         | 150                                                    | 590 / 11090                                    | 6.6                                                                                         |
| 2 (UV)                                 | 22/09/2008 (2)                         | 150                                                    | 523 / 18275                                    | 8.3                                                                                         |
| 2 (UV)                                 | 22/09/2008 (3)                         | 150                                                    | 541 / 18102                                    | 8.2                                                                                         |
| 3 (HAM)                                | 24/09/2001 (1)                         | 350                                                    | 1226 / 58084                                   | 9.3                                                                                         |
| 3 (HAM)                                | 24/09/2001 (2)                         | 350                                                    | 1156 / 78040                                   | 9.9                                                                                         |
| 3 (HAM)                                | 24/09/2001 (3)                         | 350                                                    | 1391 / 71505                                   | 9.6                                                                                         |
| 3 (HAM)                                | 04/01/2007 (1)                         | 390                                                    | 1464 / 70338                                   | 9.5                                                                                         |
| 3 (HAM)                                | 04/01/2007 (2)                         | 390                                                    | 1555 / 61548                                   | 9.2                                                                                         |
| 3 (HAM)                                | 04/01/2007 (3)                         | 390                                                    | 1085 / 56442                                   | 9.4                                                                                         |
| 3 (HAM)                                | 14/04/2008 (1)                         | 220                                                    | 875 / 43305                                    | 9.4                                                                                         |
| 3 (HAM)                                | 14/04/2008 (2)                         | 220                                                    | 974 / 53960                                    | 9.7                                                                                         |
| 3 (HAM)                                | 14/04/2008 (3)                         | 220                                                    | 922 / 45946                                    | 9.5                                                                                         |
| 4 (HAM)                                | 09/11/2000 (1)                         | 930                                                    | 1562 / 36965                                   | 7.3                                                                                         |
| 4 (HAM)                                | 09/11/2000 (2)                         | 930                                                    | 1576 / 34842                                   | 7.2                                                                                         |
| 4 (HAM)                                | 09/11/2000 (3)                         | 930                                                    | 1574 / 30292                                   | 6.8                                                                                         |
| 4 (HAM)                                | 16/03/2005 (1)                         | 960                                                    | 1833 / 37273                                   | 7.2                                                                                         |
| 4 (HAM)                                | 16/03/2005 (2)                         | 960                                                    | 2406 / 33819                                   | 6.6                                                                                         |
| 4 (HAM)                                | 16/03/2005 (3)                         | 960                                                    | 1918 / 44637                                   | 7.6                                                                                         |
| 4 (HAM)                                | 02/10/2008 (1)                         | 870                                                    | 1862 / 40070                                   | 7.4                                                                                         |
| 4 (HAM)                                | 02/10/2008 (2)                         | 870                                                    | 1788 / 29684                                   | 6.7                                                                                         |
| 4 (HAM)                                | 02/10/2008 (3)                         | 870                                                    | 1754 / 43982                                   | 7.6                                                                                         |
| 5 (HAM)                                | 12/06/2000 (1)                         | 160                                                    | 568 / 17656                                    | 8.1                                                                                         |
| 5 (HAM)                                | 12/06/2000 (2)                         | 160                                                    | 647 / 21418                                    | 8.2                                                                                         |
| 5 (HAM)                                | 12/06/2000 (3)                         | 160                                                    | 628 / 19158                                    | 8                                                                                           |
| 5 (HAM)                                | 01/12/2005 (1)                         | 180                                                    | 569 / 13454                                    | 7.2                                                                                         |

|          |                |      |               |     |
|----------|----------------|------|---------------|-----|
| 5 (HAM)  | 01/12/2005 (2) | 180  | 726 / 15333   | 7.5 |
| 5 (HAM)  | 01/12/2005 (3) | 180  | 580 / 13744   | 7.5 |
| 5 (HAM)  | 03/11/2008 (1) | 140  | 564 / 17674   | 8.4 |
| 5 (HAM)  | 03/11/2008 (2) | 140  | 545 / 16081   | 8.1 |
| 5 (HAM)  | 03/11/2008 (3) | 140  | 551 / 13849   | 7.7 |
| 6 (HAM)  | 19/03/2001 (1) | 180  | 830 / 21720   | 7.9 |
| 6 (HAM)  | 19/03/2001 (2) | 180  | 691 / 16542   | 7.4 |
| 6 (HAM)  | 19/03/2001 (3) | 180  | 802 / 20321   | 7.7 |
| 6 (HAM)  | 23/09/2004 (1) | 240  | 837 / 12750   | 6.4 |
| 6 (HAM)  | 23/09/2004 (2) | 240  | 832 / 19776   | 7.5 |
| 6 (HAM)  | 23/09/2004 (3) | 240  | 698 / 15481   | 7   |
| 6 (HAM)  | 18/06/2007 (1) | 140  | 581 / 9810    | 6.4 |
| 6 (HAM)  | 18/06/2007 (2) | 140  | 591 / 17631   | 8   |
| 6 (HAM)  | 18/06/2007 (3) | 140  | 639 / 9121    | 6.1 |
| 7 (HAM)  | 15/01/2001 (1) | 2210 | 3677 / 163991 | 8.9 |
| 7 (HAM)  | 15/01/2001 (2) | 2210 | 3251 / 163857 | 9   |
| 7 (HAM)  | 15/01/2001 (3) | 2210 | 3687 / 172011 | 9   |
| 7 (HAM)  | 03/02/2005 (1) | 2020 | 3714 / 146340 | 8.6 |
| 7 (HAM)  | 03/02/2005 (2) | 2020 | 5482 / 131888 | 7.9 |
| 7 (HAM)  | 03/02/2005 (3) | 2020 | 2981 / 157621 | 8.9 |
| 7 (HAM)  | 04/12/2008 (1) | 2000 | 4703 / 136632 | 8.2 |
| 7 (HAM)  | 04/12/2008 (2) | 2000 | 3992 / 131033 | 8.2 |
| 7 (HAM)  | 04/12/2008 (3) | 2000 | 3359 / 166248 | 9   |
| 8 (HAM)  | 25/05/2000 (1) | 2300 | 2089 / 67798  | 8   |
| 8 (HAM)  | 25/05/2000 (2) | 2300 | 2443 / 56116  | 7.3 |
| 8 (HAM)  | 25/05/2000 (3) | 2300 | 2916 / 53761  | 6.9 |
| 8 (HAM)  | 04/09/2003 (1) | 1500 | 2641 / 50085  | 7.2 |
| 8 (HAM)  | 04/09/2003 (2) | 1500 | 3235 / 39501  | 6.3 |
| 8 (HAM)  | 04/09/2003 (3) | 1500 | 3502 / 38443  | 6.1 |
| 8 (HAM)  | 22/12/2008 (1) | 1460 | 2282 / 52252  | 7.6 |
| 8 (HAM)  | 22/12/2008 (2) | 1460 | 2004 / 62329  | 8.2 |
| 8 (HAM)  | 22/12/2008 (3) | 1460 | 2129 / 49931  | 7.5 |
| 9 (HAM)  | 06/11/2000 (1) | 1990 | 1154 / 138062 | 10  |
| 9 (HAM)  | 06/11/2000 (2) | 1990 | 1946 / 131701 | 9.5 |
| 9 (HAM)  | 06/11/2000 (3) | 1990 | 1923 / 123403 | 9.5 |
| 9 (HAM)  | 01/07/2004 (1) | 1410 | 1666 / 165332 | 10  |
| 9 (HAM)  | 01/07/2004 (2) | 1410 | 2732 / 105526 | 8.9 |
| 9 (HAM)  | 01/07/2004 (3) | 1410 | 1865 / 160477 | 10  |
| 9 (HAM)  | 15/03/2007 (1) | 2080 | 1294 / 186468 | 12  |
| 9 (HAM)  | 15/03/2007 (2) | 2080 | 1169 / 130672 | 11  |
| 9 (HAM)  | 15/03/2007 (3) | 2080 | 1241 / 136643 | 11  |
| 10 (HAM) | 05/04/2004 (1) | 940  | 1598 / 70437  | 8.9 |
| 10 (HAM) | 05/04/2004 (2) | 940  | 1651 / 84639  | 9.2 |
| 10 (HAM) | 05/04/2004 (3) | 940  | 1609 / 83176  | 9.3 |
| 10 (HAM) | 13/02/2007 (1) | 770  | 2223 / 61504  | 8.3 |
| 10 (HAM) | 13/02/2007 (2) | 770  | 2409 / 63395  | 8.3 |

|                 |                |     |              |     |
|-----------------|----------------|-----|--------------|-----|
| <b>10 (HAM)</b> | 13/02/2007 (3) | 770 | 2008 / 67936 | 8.7 |
| <b>10 (HAM)</b> | 18/11/2008 (1) | 730 | 1412 / 64961 | 9   |
| <b>10 (HAM)</b> | 18/11/2008 (2) | 730 | 1941 / 67440 | 8.7 |
| <b>10 (HAM)</b> | 18/11/2008 (3) | 730 | 1662 / 56583 | 8.5 |
| <b>11 (HAM)</b> | 06/03/2000 (1) | 430 | 1238 / 45190 | 8.4 |
| <b>11 (HAM)</b> | 06/03/2000 (2) | 430 | 1371 / 66409 | 9.1 |
| <b>11 (HAM)</b> | 06/03/2000 (3) | 430 | 1727 / 79065 | 9.3 |
| <b>11 (HAM)</b> | 15/05/2003 (1) | 750 | 1805 / 53637 | 8   |
| <b>11 (HAM)</b> | 15/05/2003 (2) | 750 | 2548 / 48187 | 7.3 |
| <b>11 (HAM)</b> | 15/05/2003 (3) | 750 | 1771 / 70610 | 8.8 |
| <b>11 (HAM)</b> | 29/09/2008 (1) | 890 | 2103 / 52457 | 7.7 |
| <b>11 (HAM)</b> | 29/09/2008 (2) | 890 | 2155 / 64498 | 8.2 |
| <b>11 (HAM)</b> | 29/09/2008 (3) | 890 | 2204 / 52248 | 7.6 |

‡ Disease status: AC = asymptomatic carrier. UV = uveitis (non-HAM/TSP); HAM = HAM/TSP

## REFERENCES

1. Gillet NA, Malani N, Melamed A, Gormley N, Carter R, Bentley D, et al. The host genomic environment of the provirus determines the abundance of HTLV-1-infected T-cell clones. *Blood*. 2011;117(11):3113-22. Epub 2011/01/14. doi: <https://doi.org/10.1182/blood-2010-10-312926>. PubMed PMID: 21228324; PubMed Central PMCID: PMC3062313.
2. Laydon DJ, Melamed A, Sim A, Gillet NA, Sim K, Darko S, et al. Quantification of HTLV-1 Clonality and TCR Diversity. *PLoS Comput Biol*. 2014;10(6):e1003646. doi: 10.1371/journal.pcbi.1003646.
