# Supplementary material for: The relative contributions of infectious and mitotic spread to HTLV-1 persistence
Source: PubMed Central journal article supplement (PMC7524007; doi:10.1371/journal.pcbi.1007470), 2020-09-17
Supplement: pcbi.1007470.s005.pdf [file pcbi.1007470.s005.pdf]

**S2 Table.** Notation used in models of HTLV-1 within host persistence.

| Notation                                      | Description                                                                                                               |
|-----------------------------------------------|---------------------------------------------------------------------------------------------------------------------------|
| <b>General</b>                                |                                                                                                                           |
| $i$                                           | clone index                                                                                                               |
| $S(t)$                                        | Expected number of HTLV-1 clones at time $t$                                                                              |
| $N(t)$                                        | Expected number of HTLV-1 infected cells at time $t$                                                                      |
| $\pi$                                         | Per-capita rate of mitotic spread (infected cell proliferation)                                                           |
| $\delta$                                      | Per-capita rate of infected cell death                                                                                    |
| $r_i$                                         | Per-capita rate of infectious spread ( <i>de novo</i> infection)                                                          |
| $R$                                           | Ratio of infectious to mitotic spread                                                                                     |
| $f$                                           | Clone frequency (index)                                                                                                   |
| $n_f$                                         | Number of clones of frequency $f$                                                                                         |
| <b>Method 1: Full Simulation Hybrid Model</b> |                                                                                                                           |
| $x_i(t)$                                      | Expected number of infected cells in clone $i$ at time $t$                                                                |
| $K$                                           | Density dependency parameter. Infected cell proliferation rates are half maximal when number of infected cells $N(t) = K$ |
| $\pi^*(t)$                                    | Density-dependent proliferation rate                                                                                      |
| $c, C$                                        | Index and number of possible reactions of system respectively                                                             |
| $\rho_c$                                      | Mapping of reaction $c$                                                                                                   |
| $V_c$                                         | Stoichiometric vector of reaction $c$                                                                                     |
| $\alpha_c$                                    | Propensity function of reaction $c$                                                                                       |
| $S_{max}$                                     | Integer chosen to always be larger than $S(t)$ , for all $t$                                                              |
| $X(t)$                                        | Random variable denoting the state of the entire system (all clones and their frequencies) at time $t$                    |
| $X_i(t)$                                      | Random variable denoting the frequency of clone $i$ at time $t$                                                           |
| $y$                                           | Potential state of random variable $X(t)$                                                                                 |
| $y_0$                                         | Initial state of all clones and their frequencies                                                                         |
| $\tau$                                        | Maximum frequency that stochastically modelled clone allowed to take                                                      |

|             |                                                                                                                          |
|-------------|--------------------------------------------------------------------------------------------------------------------------|
| $F$         | Threshold frequency above which clones are modelled deterministically and below which clones are modelled stochastically |
| $b(t)$      | Number of clone births at time $t$                                                                                       |
| $E(t)$      | Expected number of clones deaths/extinctions at time $t$                                                                 |
| $S_0$       | Number of clones at time zero                                                                                            |
| $h$         | Length of time step in hybrid model                                                                                      |
| $D(t)$      | State of deterministic part of hybrid model at time $t$                                                                  |
| $\sigma(t)$ | State of stochastic part of hybrid model at time $t$                                                                     |

## Method 2: Upper Bound Approximation

|                                              |                                                                                                                                             |
|----------------------------------------------|---------------------------------------------------------------------------------------------------------------------------------------------|
| $\bar{\delta}_s$                             | Clone death rate                                                                                                                            |
| $\hat{\delta}_{small}, \hat{\delta}_{large}$ | Aggregate clone death rate of small and large clones respectively                                                                           |
| $r_{i,Supremum}$                             | Estimated supremum of infectious spread rate, assuming cell death rate $\bar{\delta}$ applies to all clones, irrespective of size           |
| $R_{Supremum}$                               | Estimated ratio of infectious spread to mitotic spread, assuming cell death rate $\bar{\delta}$ applies to all clones, irrespective of size |
| $f_{max}$                                    | Frequency above which clones do not contribute to clone death rate                                                                          |
| $r_{i, f_{max}}$                             | Estimated upper bound of infectious spread rate, assuming clones above frequency $f_{max}$ do not contribute to clone death rate            |
| $R_{f_{max}}$                                | Estimated ratio of infectious spread to mitotic spread, assuming clones above frequency $f_{max}$ do not contribute to clone death rate     |

## Method 3: Occupancy class model

|       |                                                                                                  |
|-------|--------------------------------------------------------------------------------------------------|
| $M$   | Rate of mitotic events in deterministic clone class model                                        |
| $I$   | Rate of infectious events in deterministic clone class model                                     |
| $C_i$ | Number of infected cells in class size $n_i$ in deterministic clone class model ( $C_i = fn_i$ ) |
| $R_1$ | Ratio of infectious to mitotic spread in terms of proportion of cells that are singletons        |
| $R_2$ | Ratio of infectious to mitotic spread in terms of species richness                               |
