# Supplementary material for: The relative contributions of infectious and mitotic spread to HTLV-1 persistence
Source: PubMed Central journal article supplement (PMC7524007; doi:10.1371/journal.pcbi.1007470), 2020-09-17
Supplement: pcbi.1007470.s006.pdf [file pcbi.1007470.s006.pdf]

**S3 Table.** Hybrid model sensitivity to proliferation and death rates.

| Patient<br>(Disease<br>Status <sup>‡</sup> ) | Blood<br>sample<br>[Date<br>(replicate<br>number)] | Infectious spread rate $r_i$ (d <sup>-1</sup> ) |                                          |                                           | Ratio of infectious spread to mitotic<br>spread |                                          |                                           |
|----------------------------------------------|----------------------------------------------------|-------------------------------------------------|------------------------------------------|-------------------------------------------|-------------------------------------------------|------------------------------------------|-------------------------------------------|
|                                              |                                                    | Central<br>( $\pi^* = \delta =$<br>0.0316)      | Lower<br>( $\pi^* = \delta =$<br>0.0158) | Higher<br>( $\pi^* = \delta =$<br>0.0632) | Central<br>( $\pi^* = \delta =$<br>0.0316)      | Lower<br>( $\pi^* = \delta =$<br>0.0158) | Higher<br>( $\pi^* = \delta =$<br>0.0632) |
| 1 (AC)                                       | 07/12/2000 (1)                                     | 1.20E-09                                        | 6.14E-10                                 | 2.35E-09                                  | 3.81E-08                                        | 3.89E-08                                 | 3.71E-08                                  |
| 1 (AC)                                       | 07/12/2000 (2)                                     | 1.36E-09                                        | 6.96E-10                                 | 2.65E-09                                  | 4.32E-08                                        | 4.41E-08                                 | 4.20E-08                                  |
| 1 (AC)                                       | 07/12/2000 (3)                                     | 1.15E-09                                        | 5.89E-10                                 | 2.25E-09                                  | 3.65E-08                                        | 3.73E-08                                 | 3.56E-08                                  |
| 1 (AC)                                       | 13/12/2004 (1)                                     | 9.31E-10                                        | 4.74E-10                                 | 1.81E-09                                  | 2.95E-08                                        | 3.00E-08                                 | 2.87E-08                                  |
| 1 (AC)                                       | 13/12/2004 (2)                                     | 9.58E-10                                        | 4.87E-10                                 | 1.87E-09                                  | 3.03E-08                                        | 3.08E-08                                 | 2.96E-08                                  |
| 1 (AC)                                       | 13/12/2004 (3)                                     | 5.92E-10                                        | 3.00E-10                                 | 1.16E-09                                  | 1.87E-08                                        | 1.90E-08                                 | 1.83E-08                                  |
| 1 (AC)                                       | 17/11/2008 (1)                                     | 8.03E-10                                        | 4.07E-10                                 | 1.57E-09                                  | 2.54E-08                                        | 2.58E-08                                 | 2.48E-08                                  |
| 1 (AC)                                       | 17/11/2008 (2)                                     | 1.39E-09                                        | 7.08E-10                                 | 2.70E-09                                  | 4.39E-08                                        | 4.48E-08                                 | 4.27E-08                                  |
| 1 (AC)                                       | 17/11/2008 (3)                                     | 9.31E-10                                        | 4.73E-10                                 | 1.82E-09                                  | 2.95E-08                                        | 3.00E-08                                 | 2.88E-08                                  |
| 2 (UV)                                       | 03/04/2000 (1)                                     | 1.14E-09                                        | 5.77E-10                                 | 2.23E-09                                  | 3.60E-08                                        | 3.65E-08                                 | 3.53E-08                                  |
| 2 (UV)                                       | 03/04/2000 (2)                                     | 9.46E-10                                        | 4.78E-10                                 | 1.85E-09                                  | 2.99E-08                                        | 3.03E-08                                 | 2.93E-08                                  |
| 2 (UV)                                       | 03/04/2000 (3)                                     | 1.32E-09                                        | 6.68E-10                                 | 2.57E-09                                  | 4.16E-08                                        | 4.23E-08                                 | 4.07E-08                                  |
| 2 (UV)                                       | 16/06/2005 (1)                                     | 1.56E-09                                        | 7.90E-10                                 | 3.04E-09                                  | 4.92E-08                                        | 5.00E-08                                 | 4.81E-08                                  |
| 2 (UV)                                       | 16/06/2005 (2)                                     | 1.11E-09                                        | 5.61E-10                                 | 2.18E-09                                  | 3.51E-08                                        | 3.55E-08                                 | 3.44E-08                                  |
| 2 (UV)                                       | 16/06/2005 (3)                                     | 1.59E-09                                        | 8.05E-10                                 | 3.10E-09                                  | 5.02E-08                                        | 5.10E-08                                 | 4.90E-08                                  |
| 2 (UV)                                       | 22/09/2008 (1)                                     | 4.77E-10                                        | 2.40E-10                                 | 9.41E-10                                  | 1.51E-08                                        | 1.52E-08                                 | 1.49E-08                                  |
| 2 (UV)                                       | 22/09/2008 (2)                                     | 9.47E-10                                        | 4.80E-10                                 | 1.85E-09                                  | 3.00E-08                                        | 3.04E-08                                 | 2.93E-08                                  |
| 2 (UV)                                       | 22/09/2008 (3)                                     | 9.30E-10                                        | 4.71E-10                                 | 1.82E-09                                  | 2.94E-08                                        | 2.98E-08                                 | 2.88E-08                                  |
| 3 (HAM)                                      | 24/09/2001 (1)                                     | 1.40E-09                                        | 7.16E-10                                 | 2.74E-09                                  | 4.45E-08                                        | 4.53E-08                                 | 4.33E-08                                  |
| 3 (HAM)                                      | 24/09/2001 (2)                                     | 1.98E-09                                        | 1.01E-09                                 | 3.85E-09                                  | 6.27E-08                                        | 6.40E-08                                 | 6.09E-08                                  |
| 3 (HAM)                                      | 24/09/2001 (3)                                     | 1.77E-09                                        | 9.00E-10                                 | 3.44E-09                                  | 5.59E-08                                        | 5.70E-08                                 | 5.44E-08                                  |
| 3 (HAM)                                      | 04/01/2007 (1)                                     | 1.55E-09                                        | 7.89E-10                                 | 3.01E-09                                  | 4.90E-08                                        | 4.99E-08                                 | 4.77E-08                                  |
| 3 (HAM)                                      | 04/01/2007 (2)                                     | 1.32E-09                                        | 6.73E-10                                 | 2.58E-09                                  | 4.18E-08                                        | 4.26E-08                                 | 4.08E-08                                  |
| 3 (HAM)                                      | 04/01/2007 (3)                                     | 1.24E-09                                        | 6.30E-10                                 | 2.41E-09                                  | 3.91E-08                                        | 3.99E-08                                 | 3.81E-08                                  |
| 3 (HAM)                                      | 14/04/2008 (1)                                     | 1.68E-09                                        | 8.58E-10                                 | 3.28E-09                                  | 5.33E-08                                        | 5.43E-08                                 | 5.19E-08                                  |
| 3 (HAM)                                      | 14/04/2008 (2)                                     | 2.14E-09                                        | 1.09E-09                                 | 4.17E-09                                  | 6.78E-08                                        | 6.92E-08                                 | 6.60E-08                                  |
| 3 (HAM)                                      | 14/04/2008 (3)                                     | 1.79E-09                                        | 9.11E-10                                 | 3.48E-09                                  | 5.66E-08                                        | 5.77E-08                                 | 5.51E-08                                  |
| 4 (HAM)                                      | 09/11/2000 (1)                                     | 2.77E-10                                        | 1.40E-10                                 | 5.44E-10                                  | 8.77E-09                                        | 8.85E-09                                 | 8.61E-09                                  |
| 4 (HAM)                                      | 09/11/2000 (2)                                     | 2.60E-10                                        | 1.31E-10                                 | 5.11E-10                                  | 8.23E-09                                        | 8.31E-09                                 | 8.08E-09                                  |
| 4 (HAM)                                      | 09/11/2000 (3)                                     | 2.14E-10                                        | 1.08E-10                                 | 4.22E-10                                  | 6.78E-09                                        | 6.84E-09                                 | 6.67E-09                                  |
| 4 (HAM)                                      | 16/03/2005 (1)                                     | 2.68E-10                                        | 1.35E-10                                 | 5.26E-10                                  | 8.47E-09                                        | 8.55E-09                                 | 8.32E-09                                  |
| 4 (HAM)                                      | 16/03/2005 (2)                                     | 2.27E-10                                        | 1.14E-10                                 | 4.48E-10                                  | 7.19E-09                                        | 7.25E-09                                 | 7.08E-09                                  |
| 4 (HAM)                                      | 16/03/2005 (3)                                     | 3.35E-10                                        | 1.70E-10                                 | 6.57E-10                                  | 1.06E-08                                        | 1.07E-08                                 | 1.04E-08                                  |
| 4 (HAM)                                      | 02/10/2008 (1)                                     | 3.26E-10                                        | 1.65E-10                                 | 6.41E-10                                  | 1.03E-08                                        | 1.04E-08                                 | 1.01E-08                                  |
| 4 (HAM)                                      | 02/10/2008 (2)                                     | 2.22E-10                                        | 1.12E-10                                 | 4.38E-10                                  | 7.03E-09                                        | 7.08E-09                                 | 6.93E-09                                  |
| 4 (HAM)                                      | 02/10/2008 (3)                                     | 3.67E-10                                        | 1.86E-10                                 | 7.20E-10                                  | 1.16E-08                                        | 1.18E-08                                 | 1.14E-08                                  |
| 5 (HAM)                                      | 12/06/2000 (1)                                     | 8.35E-10                                        | 4.23E-10                                 | 1.64E-09                                  | 2.64E-08                                        | 2.68E-08                                 | 2.59E-08                                  |
| 5 (HAM)                                      | 12/06/2000 (2)                                     | 1.03E-09                                        | 5.22E-10                                 | 2.02E-09                                  | 3.26E-08                                        | 3.31E-08                                 | 3.19E-08                                  |

|          |                |          |          |          |          |          |          |
|----------|----------------|----------|----------|----------|----------|----------|----------|
| 5 (HAM)  | 12/06/2000 (3) | 9.00E-10 | 4.56E-10 | 1.76E-09 | 2.85E-08 | 2.89E-08 | 2.79E-08 |
| 5 (HAM)  | 01/12/2005 (1) | 5.20E-10 | 2.63E-10 | 1.02E-09 | 1.65E-08 | 1.66E-08 | 1.62E-08 |
| 5 (HAM)  | 01/12/2005 (2) | 6.08E-10 | 3.07E-10 | 1.19E-09 | 1.92E-08 | 1.94E-08 | 1.89E-08 |
| 5 (HAM)  | 01/12/2005 (3) | 5.42E-10 | 2.74E-10 | 1.06E-09 | 1.72E-08 | 1.74E-08 | 1.68E-08 |
| 5 (HAM)  | 03/11/2008 (1) | 9.91E-10 | 5.03E-10 | 1.94E-09 | 3.14E-08 | 3.18E-08 | 3.06E-08 |
| 5 (HAM)  | 03/11/2008 (2) | 8.73E-10 | 4.42E-10 | 1.71E-09 | 2.76E-08 | 2.80E-08 | 2.71E-08 |
| 5 (HAM)  | 03/11/2008 (3) | 7.23E-10 | 3.66E-10 | 1.42E-09 | 2.29E-08 | 2.32E-08 | 2.24E-08 |
| 6 (HAM)  | 19/03/2001 (1) | 8.98E-10 | 4.55E-10 | 1.76E-09 | 2.84E-08 | 2.88E-08 | 2.79E-08 |
| 6 (HAM)  | 19/03/2001 (2) | 6.53E-10 | 3.30E-10 | 1.28E-09 | 2.07E-08 | 2.09E-08 | 2.03E-08 |
| 6 (HAM)  | 19/03/2001 (3) | 8.24E-10 | 4.17E-10 | 1.62E-09 | 2.61E-08 | 2.64E-08 | 2.56E-08 |
| 6 (HAM)  | 23/09/2004 (1) | 3.35E-10 | 1.69E-10 | 6.61E-10 | 1.06E-08 | 1.07E-08 | 1.05E-08 |
| 6 (HAM)  | 23/09/2004 (2) | 5.89E-10 | 2.98E-10 | 1.16E-09 | 1.86E-08 | 1.88E-08 | 1.83E-08 |
| 6 (HAM)  | 23/09/2004 (3) | 4.37E-10 | 2.21E-10 | 8.60E-10 | 1.38E-08 | 1.40E-08 | 1.36E-08 |
| 6 (HAM)  | 18/06/2007 (1) | 4.41E-10 | 2.22E-10 | 8.70E-10 | 1.40E-08 | 1.40E-08 | 1.38E-08 |
| 6 (HAM)  | 18/06/2007 (2) | 9.50E-10 | 4.82E-10 | 1.86E-09 | 3.01E-08 | 3.05E-08 | 2.94E-08 |
| 6 (HAM)  | 18/06/2007 (3) | 3.94E-10 | 1.98E-10 | 7.78E-10 | 1.25E-08 | 1.25E-08 | 1.23E-08 |
| 7 (HAM)  | 15/01/2001 (1) | 6.06E-10 | 3.08E-10 | 1.18E-09 | 1.92E-08 | 1.95E-08 | 1.87E-08 |
| 7 (HAM)  | 15/01/2001 (2) | 6.09E-10 | 3.10E-10 | 1.19E-09 | 1.93E-08 | 1.96E-08 | 1.88E-08 |
| 7 (HAM)  | 15/01/2001 (3) | 6.40E-10 | 3.25E-10 | 1.25E-09 | 2.02E-08 | 2.06E-08 | 1.97E-08 |
| 7 (HAM)  | 03/02/2005 (1) | 5.74E-10 | 2.92E-10 | 1.12E-09 | 1.82E-08 | 1.85E-08 | 1.77E-08 |
| 7 (HAM)  | 03/02/2005 (2) | 4.88E-10 | 2.47E-10 | 9.56E-10 | 1.55E-08 | 1.57E-08 | 1.51E-08 |
| 7 (HAM)  | 03/02/2005 (3) | 6.39E-10 | 3.25E-10 | 1.25E-09 | 2.02E-08 | 2.06E-08 | 1.97E-08 |
| 7 (HAM)  | 04/12/2008 (1) | 5.26E-10 | 2.67E-10 | 1.03E-09 | 1.67E-08 | 1.69E-08 | 1.63E-08 |
| 7 (HAM)  | 04/12/2008 (2) | 5.04E-10 | 2.56E-10 | 9.87E-10 | 1.60E-08 | 1.62E-08 | 1.56E-08 |
| 7 (HAM)  | 04/12/2008 (3) | 6.85E-10 | 3.48E-10 | 1.34E-09 | 2.17E-08 | 2.20E-08 | 2.11E-08 |
| 8 (HAM)  | 25/05/2000 (1) | 2.21E-10 | 1.12E-10 | 4.32E-10 | 6.98E-09 | 7.08E-09 | 6.83E-09 |
| 8 (HAM)  | 25/05/2000 (2) | 1.70E-10 | 8.61E-11 | 3.35E-10 | 5.39E-09 | 5.45E-09 | 5.29E-09 |
| 8 (HAM)  | 25/05/2000 (3) | 1.55E-10 | 7.84E-11 | 3.06E-10 | 4.92E-09 | 4.96E-09 | 4.84E-09 |
| 8 (HAM)  | 04/09/2003 (1) | 2.31E-10 | 1.17E-10 | 4.54E-10 | 7.30E-09 | 7.38E-09 | 7.18E-09 |
| 8 (HAM)  | 04/09/2003 (2) | 1.63E-10 | 8.20E-11 | 3.21E-10 | 5.16E-09 | 5.19E-09 | 5.09E-09 |
| 8 (HAM)  | 04/09/2003 (3) | 1.55E-10 | 7.79E-11 | 3.07E-10 | 4.91E-09 | 4.93E-09 | 4.86E-09 |
| 8 (HAM)  | 22/12/2008 (1) | 2.59E-10 | 1.31E-10 | 5.07E-10 | 8.19E-09 | 8.29E-09 | 8.02E-09 |
| 8 (HAM)  | 22/12/2008 (2) | 3.28E-10 | 1.66E-10 | 6.43E-10 | 1.04E-08 | 1.05E-08 | 1.02E-08 |
| 8 (HAM)  | 22/12/2008 (3) | 2.46E-10 | 1.24E-10 | 4.82E-10 | 7.77E-09 | 7.86E-09 | 7.62E-09 |
| 9 (HAM)  | 06/11/2000 (1) | 6.34E-10 | 3.24E-10 | 1.23E-09 | 2.00E-08 | 2.05E-08 | 1.94E-08 |
| 9 (HAM)  | 06/11/2000 (2) | 5.68E-10 | 2.90E-10 | 1.11E-09 | 1.80E-08 | 1.83E-08 | 1.75E-08 |
| 9 (HAM)  | 06/11/2000 (3) | 5.30E-10 | 2.70E-10 | 1.03E-09 | 1.68E-08 | 1.71E-08 | 1.63E-08 |
| 9 (HAM)  | 01/07/2004 (1) | 1.08E-09 | 5.54E-10 | 2.10E-09 | 3.42E-08 | 3.50E-08 | 3.32E-08 |
| 9 (HAM)  | 01/07/2004 (2) | 6.13E-10 | 3.12E-10 | 1.20E-09 | 1.94E-08 | 1.97E-08 | 1.89E-08 |
| 9 (HAM)  | 01/07/2004 (3) | 1.03E-09 | 5.29E-10 | 2.01E-09 | 3.28E-08 | 3.35E-08 | 3.18E-08 |
| 9 (HAM)  | 15/03/2007 (1) | 9.19E-10 | 4.74E-10 | 1.77E-09 | 2.91E-08 | 3.00E-08 | 2.80E-08 |
| 9 (HAM)  | 15/03/2007 (2) | 5.86E-10 | 3.00E-10 | 1.13E-09 | 1.85E-08 | 1.90E-08 | 1.80E-08 |
| 9 (HAM)  | 15/03/2007 (3) | 6.15E-10 | 3.15E-10 | 1.19E-09 | 1.95E-08 | 1.99E-08 | 1.89E-08 |
| 10 (HAM) | 05/04/2004 (1) | 6.10E-10 | 3.10E-10 | 1.19E-09 | 1.93E-08 | 1.96E-08 | 1.88E-08 |
| 10 (HAM) | 05/04/2004 (2) | 7.56E-10 | 3.85E-10 | 1.47E-09 | 2.39E-08 | 2.44E-08 | 2.33E-08 |

|             |                |          |          |          |          |          |          |
|-------------|----------------|----------|----------|----------|----------|----------|----------|
| 10<br>(HAM) | 05/04/2004 (3) | 7.45E-10 | 3.79E-10 | 1.45E-09 | 2.36E-08 | 2.40E-08 | 2.30E-08 |
| 10<br>(HAM) | 13/02/2007 (1) | 6.19E-10 | 3.14E-10 | 1.21E-09 | 1.96E-08 | 1.99E-08 | 1.91E-08 |
| 10<br>(HAM) | 13/02/2007 (2) | 6.36E-10 | 3.22E-10 | 1.24E-09 | 2.01E-08 | 2.04E-08 | 1.97E-08 |
| 10<br>(HAM) | 13/02/2007 (3) | 7.08E-10 | 3.60E-10 | 1.38E-09 | 2.24E-08 | 2.28E-08 | 2.19E-08 |
| 10<br>(HAM) | 18/11/2008 (1) | 7.34E-10 | 3.74E-10 | 1.43E-09 | 2.32E-08 | 2.37E-08 | 2.27E-08 |
| 10<br>(HAM) | 18/11/2008 (2) | 7.42E-10 | 3.77E-10 | 1.45E-09 | 2.35E-08 | 2.38E-08 | 2.29E-08 |
| 10<br>(HAM) | 18/11/2008 (3) | 6.11E-10 | 3.10E-10 | 1.19E-09 | 1.93E-08 | 1.96E-08 | 1.89E-08 |
| 11<br>(HAM) | 06/03/2000 (1) | 8.20E-10 | 4.16E-10 | 1.60E-09 | 2.60E-08 | 2.63E-08 | 2.54E-08 |
| 11<br>(HAM) | 06/03/2000 (2) | 1.29E-09 | 6.56E-10 | 2.51E-09 | 4.08E-08 | 4.15E-08 | 3.98E-08 |
| 11<br>(HAM) | 06/03/2000 (3) | 1.55E-09 | 7.90E-10 | 3.02E-09 | 4.91E-08 | 5.00E-08 | 4.78E-08 |
| 11<br>(HAM) | 15/05/2003 (1) | 5.36E-10 | 2.71E-10 | 1.05E-09 | 1.70E-08 | 1.72E-08 | 1.66E-08 |
| 11<br>(HAM) | 15/05/2003 (2) | 4.50E-10 | 2.27E-10 | 8.83E-10 | 1.42E-08 | 1.44E-08 | 1.40E-08 |
| 11<br>(HAM) | 15/05/2003 (3) | 7.60E-10 | 3.86E-10 | 1.48E-09 | 2.40E-08 | 2.44E-08 | 2.35E-08 |
| 11<br>(HAM) | 29/09/2008 (1) | 4.29E-10 | 2.17E-10 | 8.42E-10 | 1.36E-08 | 1.37E-08 | 1.33E-08 |
| 11<br>(HAM) | 29/09/2008 (2) | 5.58E-10 | 2.83E-10 | 1.09E-09 | 1.76E-08 | 1.79E-08 | 1.73E-08 |
| 11<br>(HAM) | 29/09/2008 (3) | 4.24E-10 | 2.14E-10 | 8.31E-10 | 1.34E-08 | 1.36E-08 | 1.32E-08 |

‡ Disease status: AC = asymptomatic carrier. UV = uveitis (non-HAM/TSP); HAM = HAM/TSP
